# Supplementary material for: Elements of Return-to-Work Interventions for Workers on Long-Term Sick Leave: A Systematic Literature Review
Source: Springer Nature journal article supplement (doi:10.1007/s10926-024-10203-0), 2024-06-07
Supplement: MOESM1 [file 10926_2024_10203_MOESM1_ESM.pdf]

# Elements of return-to-work interventions for workers on long-term sick leave: a systematic literature review

Christa J.C. de Geus, Maaïke A. Huysmans, H. Jolanda van Rijssen, Marianne de Maaker-de Berkhof, Linda J.

Schoonmade, Johannes R. Anema

## Appendix 1: search strategy

### Search History PubMed February 7, 2022

| Search | Query                                                                                                                                                                                                                                                                                                                                                                                                                                                                                                                                                                                                                                                                                                                                                                        | Items found |
|--------|------------------------------------------------------------------------------------------------------------------------------------------------------------------------------------------------------------------------------------------------------------------------------------------------------------------------------------------------------------------------------------------------------------------------------------------------------------------------------------------------------------------------------------------------------------------------------------------------------------------------------------------------------------------------------------------------------------------------------------------------------------------------------|-------------|
| #5     | (#1 OR #2) AND #3 AND #4                                                                                                                                                                                                                                                                                                                                                                                                                                                                                                                                                                                                                                                                                                                                                     | 4,230       |
| #4     | "Clinical Trials as Topic"[Mesh] OR "Controlled Clinical Trials as Topic"[Mesh] OR "Controlled Clinical Trial" [Publication Type] OR "Random Allocation"[Mesh] OR ((random*[tiab] AND (controlled[tiab] OR control[tiab] OR versus[tiab] OR vs[tiab] OR group[tiab] OR groups[tiab] OR comparison[tiab] OR compared[tiab] OR arm[tiab] OR arms[tiab] OR crossover[tiab] OR cross-over[tiab])) AND (trial[tiab] OR study[tiab]))                                                                                                                                                                                                                                                                                                                                              | 1,372,398   |
| #3     | "Rehabilitation, Vocational"[Mesh] OR "Case Management"[Mesh] OR "Occupational Therapy"[Mesh] OR "Counseling"[Mesh] OR "Rehabilitation"[Mesh] OR intervention*[tiab] OR program*[tiab] OR "case manag*[tiab] OR casemanag*[tiab] OR "occupational therap*[tiab] OR counseling[tiab] OR counselling[tiab] OR rehabilitation[tiab] OR "absence management"[tiab] OR project*[tiab] OR plan[tiab] OR model[tiab]                                                                                                                                                                                                                                                                                                                                                                | 4,932,675   |
| #2     | "Insurance, Disability"[Mesh] OR ((beneficiar*[tiab] OR pension*[tiab] OR claim*[tiab] OR compensation*[tiab] OR insurance*[tiab] OR security[tiab])) AND ("Disabled Persons"[Mesh] OR sickness[tiab] OR disabilit*[tiab] OR disabled[tiab] OR invalidit*[tiab] OR absente*[tiab] OR absence[tiab] OR illness[tiab]))                                                                                                                                                                                                                                                                                                                                                                                                                                                        | 34,761      |
| #1     | "Absenteeism"[Mesh] OR "Sick Leave"[Mesh] OR "Return to Work"[Mesh] OR "rehabilitation, vocational"[Mesh] OR "Return to Work"[tiab] OR "work resumption"[tiab] OR "back to work"[tiab] OR "work disab*[tiab] OR "work incapacit*[tiab] OR "work incapacilit*[tiab] OR "work capacit*[tiab] OR "work capabilit*[tiab] OR "work inhibition*[tiab] OR "working incapacit*[tiab] OR "working capacit*[tiab] OR "medical leave*[tiab] OR "sick leave*[tiab] OR "disability leave*[tiab] OR "absente*[tiab] OR "work absen*[tiab] OR "sickness absen*[tiab] OR "disability absen*[tiab] OR "sick day*[tiab] OR "illness day*[tiab] OR "sick listed"[tiab] OR "reintegration"[tiab] OR "reemployment"[tiab] OR "re-employment"[tiab] OR "job reentry"[tiab] OR "job re-entry"[tiab] | 54,084      |

**Search History Embase.com February 7, 2022**

| Search | Query                                                                                                                                                                                                                                                                                                                                                                                                                                                                                                                                                                                                                                                                                                                                                                                       | Items found |
|--------|---------------------------------------------------------------------------------------------------------------------------------------------------------------------------------------------------------------------------------------------------------------------------------------------------------------------------------------------------------------------------------------------------------------------------------------------------------------------------------------------------------------------------------------------------------------------------------------------------------------------------------------------------------------------------------------------------------------------------------------------------------------------------------------------|-------------|
| #6     | #5 NOT 'conference abstract'/it                                                                                                                                                                                                                                                                                                                                                                                                                                                                                                                                                                                                                                                                                                                                                             | 3,940       |
| #5     | (#1 OR #2) AND #3 AND #4                                                                                                                                                                                                                                                                                                                                                                                                                                                                                                                                                                                                                                                                                                                                                                    | 4,901       |
| #4     | 'clinical trial (topic)'/exp OR 'controlled clinical trial (topic)'/exp OR 'randomization'/exp OR ((random*:ab,ti,kw AND (controlled:ab,ti,kw OR control:ab,ti,kw OR versus:ab,ti,kw OR vs:ab,ti,kw OR group:ab,ti,kw OR groups:ab,ti,kw OR comparison:ab,ti,kw OR compared:ab,ti,kw OR arm:ab,ti,kw OR arms:ab,ti,kw OR crossover:ab,ti,kw OR 'cross-over':ab,ti,kw) AND (trial:ab,ti,kw OR study:ab,ti,kw)))                                                                                                                                                                                                                                                                                                                                                                              | 1,435,337   |
| #3     | 'vocational rehabilitation'/exp OR 'case management'/exp OR 'occupational therapy'/exp OR 'rehabilitation'/exp OR 'intervention study'/exp OR 'counseling'/exp OR intervention*:ab,ti,kw OR program*:ab,ti,kw OR 'case manag*':ab,ti,kw OR casemanag*:ab,ti,kw OR 'occupational therap*':ab,ti,kw OR counseling:ab,ti,kw OR counselling:ab,ti,kw OR rehabilitation:ab,ti,kw OR 'absence management':ab,ti,kw OR project*:ab,ti,kw OR plan:ab,ti,kw OR model:ab,ti,kw                                                                                                                                                                                                                                                                                                                        | 6,485,130   |
| #2     | ('insurance'/exp OR beneficiar*:ab,ti,kw OR pension*:ab,ti,kw OR claim*:ab,ti,kw OR compensation*:ab,ti,kw OR insurance*:ab,ti,kw OR security:ab,ti,kw) AND ('disabled person'/exp OR sickness:ab,ti,kw OR disabilit*:ab,ti,kw OR disabled:ab,ti,kw OR invalidit*:ab,ti,kw OR absente*:ab,ti,kw OR absence:ab,ti,kw OR illness:ab,ti,kw)                                                                                                                                                                                                                                                                                                                                                                                                                                                    | 47,626      |
| #1     | 'absenteeism'/exp OR 'medical leave'/exp OR 'return to work'/exp OR 'vocational rehabilitation'/exp OR 'work resumption'/exp OR 'return to work':ab,ti,kw OR 'back to work':ab,ti,kw OR 'work disab*':ab,ti,kw OR 'work incapacit*':ab,ti,kw OR 'work incapacilit*':ab,ti,kw OR 'work capacit*':ab,ti,kw OR 'work capabilit*':ab,ti,kw OR 'working incapacit*':ab,ti,kw OR 'working capacit*':ab,ti,kw OR 'medical leave*':ab,ti,kw OR 'sick leave*':ab,ti,kw OR 'disability leave*':ab,ti,kw OR absente*:ab,ti,kw OR 'work absen*':ab,ti,kw OR 'sickness absen*':ab,ti,kw OR 'sick day*':ab,ti,kw OR 'illness day*':ab,ti,kw OR 'sick listed':ab,ti,kw OR reintegration:ab,ti,kw OR reemployment:ab,ti,kw OR 're-employment':ab,ti,kw OR 'job reentry':ab,ti,kw OR 'job re-entry':ab,ti,kw | 72,880      |

**Search History APA PsycInfo (Ebsco) February 7, 2022**

| Search | Query                                                                                                                                                                                                                          | Items found |
|--------|--------------------------------------------------------------------------------------------------------------------------------------------------------------------------------------------------------------------------------|-------------|
| S5     | (S1 OR S2) AND S3 AND S4                                                                                                                                                                                                       | 975         |
| S4     | (ZC "clinical trial") OR ((DE ("Clinical Trials" OR "Random Sampling") OR (TI (random*) OR AB (random*) OR KW (random*)) AND (TI (controlled OR control OR versus OR vs OR group OR groups OR comparison OR compared OR arm OR | 152,384     |

| Search | Query                                                                                                                                                                                                                                                                                                                                                                                                                                                                                                                                                                                                                                                                                                                                                                                                                                                                                                                                                | Items found |
|--------|------------------------------------------------------------------------------------------------------------------------------------------------------------------------------------------------------------------------------------------------------------------------------------------------------------------------------------------------------------------------------------------------------------------------------------------------------------------------------------------------------------------------------------------------------------------------------------------------------------------------------------------------------------------------------------------------------------------------------------------------------------------------------------------------------------------------------------------------------------------------------------------------------------------------------------------------------|-------------|
|        | arms OR crossover OR "cross-over") OR AB (controlled OR control OR versus OR vs OR group OR groups OR comparison OR compared OR arm OR arms OR crossover OR "cross-over") OR KW (controlled OR control OR versus OR vs OR group OR groups OR comparison OR compared OR arm OR arms OR crossover OR "cross-over")) AND (TI (trial OR study) OR AB (trial OR study) OR KW (trial OR study)))                                                                                                                                                                                                                                                                                                                                                                                                                                                                                                                                                           |             |
| S3     | DE ("Vocational Rehabilitation" OR "Supported Employment" OR "Vocational Evaluation" OR "Work Adjustment Training" OR "Rehabilitation Counseling" OR "Occupational Guidance" OR "Employee Assistance Programs" OR "Counseling" OR "Case Management" OR "Occupational Therapy" OR "Rehabilitation" OR "Counseling" OR "Intervention" OR "Workplace Intervention") OR TI (intervention* OR program* OR "case manag*" OR casemanag* OR "occupational therap*" OR counseling OR counselling OR rehabilitation OR absence management OR project OR plan OR model) OR AB (intervention* OR program* OR "case manag*" OR casemanag* OR "occupational therap*" OR counseling OR counselling OR rehabilitation OR absence management OR project OR plan OR model) OR KW (intervention* OR program* OR "case manag*" OR casemanag* OR "occupational therap*" OR counseling OR counselling OR rehabilitation OR absence management OR project OR plan OR model) | 1,577,072   |
| S2     | (DE ("Social Security" OR "Insurance" OR "Employee Leave Benefits") OR TI (beneficiar* OR pension* OR claim* OR compensation* OR insurance* OR security) OR AB (beneficiar* OR pension* OR claim* OR compensation* OR insurance* OR security) OR KW (beneficiar* OR pension* OR claim* OR compensation* OR insurance* OR security)) AND (DE ("Disabled Personnel" OR "Disabilities") OR TI (sickness OR disabilit* OR disabled OR invalidit* OR absente* OR absence OR illness) OR AB (sickness OR disabilit* OR disabled OR invalidit* OR absente* OR absence OR illness) OR KW (sickness OR disabilit* OR disabled OR invalidit* OR absente* OR absence OR illness))                                                                                                                                                                                                                                                                               | 13,537      |
| S1     | DE ("Employee Absenteeism" OR "Reemployment" OR "Vocational Rehabilitation") OR TI ( "return to work" OR "back to work" OR "work disab*" OR "work incapacit*" OR "work incapabilit*" OR "work capacit*" OR "work capabilit*" OR "working incapacit*" OR "working capacit*" OR "medical leave*" OR "sick leave*" OR "disability leave*" OR absente* OR "work absen*" OR "sickness absen*" OR "sick day*" OR "illness day*" OR "sick listed" OR reintegration OR reemployment OR "re-employment" OR "job reentry" OR "job re-entry") OR AB ( "return to work" OR "back to work" OR "work disab*" OR "work incapacit*" OR "work incapabilit*" OR "work capacit*" OR "work capabilit*" OR "working incapacit*" OR "working capacit*" OR "medical leave*" OR "sick leave*" OR "disability leave*" OR absente* OR "work absen*" OR "sickness absen*" OR "sick day*" OR "illness day*" OR "sick listed" OR                                                  | 21,656      |

| Search | Query                                                                                                                                                                                                                                                                                                                                                                                                                                                                                            | Items found |
|--------|--------------------------------------------------------------------------------------------------------------------------------------------------------------------------------------------------------------------------------------------------------------------------------------------------------------------------------------------------------------------------------------------------------------------------------------------------------------------------------------------------|-------------|
|        | reintegration OR reemployment OR "re-employment" OR "job reentry" OR "job re-entry")OR KW ( "return to work" OR "back to work" OR "work* disab*" OR "work* incapacit*" OR "work* incapabilit*" OR "work* capacit*" OR "work* capabilit*" OR "medical leave*" OR "sick leave*" OR "disability leave*" OR absente* OR "work absen*" OR "sickness absen*" OR "sick day*" OR "illness day*" OR "sick listed" OR reintegration OR reemployment OR "re-employment" OR "job reentry" OR "job re-entry") |             |

#### Search History Cinahl (Ebsco) February 7, 2022

| Search | Query                                                                                                                                                                                                                                                                                                                                                                                                                                                                                                                                                                                                                                                                                                                                                                                                                                                                                                                                                                                     | Items found |
|--------|-------------------------------------------------------------------------------------------------------------------------------------------------------------------------------------------------------------------------------------------------------------------------------------------------------------------------------------------------------------------------------------------------------------------------------------------------------------------------------------------------------------------------------------------------------------------------------------------------------------------------------------------------------------------------------------------------------------------------------------------------------------------------------------------------------------------------------------------------------------------------------------------------------------------------------------------------------------------------------------------|-------------|
| S5     | (S1 OR S2) AND S3 AND S4                                                                                                                                                                                                                                                                                                                                                                                                                                                                                                                                                                                                                                                                                                                                                                                                                                                                                                                                                                  | 2,211       |
| S4     | (MH "Clinical Trials+" OR "Random Sample+") OR ((TI (random*) OR AB (random*)) AND (TI (controlled OR control OR versus OR vs OR group OR groups OR comparison OR compared OR arm OR arms OR crossover OR "cross-over") OR AB (controlled OR control OR versus OR vs OR group OR groups OR comparison OR compared OR arm OR arms OR crossover OR "cross-over"))) AND (TI (trial OR study) OR AB (trial OR study)))                                                                                                                                                                                                                                                                                                                                                                                                                                                                                                                                                                        | 486,295     |
| S3     | MH ("Rehabilitation, Vocational+" OR "Rehabilitation+" OR "Case Management" OR "Occupational Therapy+" OR "Counseling+") OR TI (intervention* OR program* OR "case manag*" OR casemanag* OR "occupational therap*" OR counseling OR counselling OR rehabilitation OR absence management OR project OR plan OR model) OR AB (intervention* OR program* OR "case manag*" OR casemanag* OR "occupational therap*" OR counseling OR counselling OR rehabilitation OR absence management OR project OR plan OR model)                                                                                                                                                                                                                                                                                                                                                                                                                                                                          | 1,668,832   |
| S2     | ((MH "Insurance+") OR TI (beneficiar* OR pension* OR claim* OR compensation* OR insurance* OR security) OR AB (beneficiar* OR pension* OR claim* OR compensation* OR insurance* OR security)) AND ((MH "Disabled") OR TI (sickness OR disabilit* OR disabled OR invalidit* OR absente* OR absence OR illness) OR AB (sickness OR disabilit* OR disabled OR invalidit* OR absente* OR absence OR illness))                                                                                                                                                                                                                                                                                                                                                                                                                                                                                                                                                                                 | 14,894      |
| S1     | MH ("Job Re-Entry" OR "Absenteeism" OR "Vocational Guidance" OR "Sick Leave") OR TI ( "return to work" OR "back to work" OR "work disab*" OR "work incapacit*" OR "work incapabilit*" OR "work capacit*" OR "work capabilit*" OR "working incapacit*" OR "working capacit*" OR "medical leave*" OR "sick leave*" OR "disability leave*" OR absente* OR "work absen*" OR "sickness absen*" OR "sick day*" OR "illness day*" OR "sick listed" OR reintegration OR reemployment OR "re-employment" OR "job reentry" OR "job re-entry") OR AB ( "return to work" OR "back to work" OR "work disab*" OR "work incapacit*" OR "work incapabilit*" OR "work capacit*" OR "work capabilit*" OR "working incapacit*" OR "working capacit*" OR "medical leave*" OR "sick leave*" OR "disability leave*" OR absente* OR "work absen*" OR "sickness absen*" OR "sick day*" OR "illness day*" OR "sick listed" OR reintegration OR reemployment OR "re-employment" OR "job reentry" OR "job re-entry") | 25,734      |

| Search | Query                                                                                                                                                                                                                                                                                                                                                              | Items found |
|--------|--------------------------------------------------------------------------------------------------------------------------------------------------------------------------------------------------------------------------------------------------------------------------------------------------------------------------------------------------------------------|-------------|
|        | OR "work incapacit*" OR "work capacit*" OR "work capabilit*" OR "working incapacit*" OR "working capacit*" OR "medical leave*" OR "sick leave*" OR "disability leave*" OR absente* OR "work absen*" OR "sickness absen*" OR "sick day*" OR "illness day*" OR "sick listed" OR reintegration OR reemployment OR "re-employment" OR "job reentry" OR "job re-entry") |             |

#### Search History Scopus February 7, 2022

| Search | Query                                                                                                                                                                                                                                                                                                                                                                                                              | Items found |
|--------|--------------------------------------------------------------------------------------------------------------------------------------------------------------------------------------------------------------------------------------------------------------------------------------------------------------------------------------------------------------------------------------------------------------------|-------------|
| #5     | (#1 OR #2) AND #3 AND #4                                                                                                                                                                                                                                                                                                                                                                                           | 7,498       |
| #4     | TITLE-ABS-KEY((random* AND (controlled OR control OR versus OR vs OR group OR groups OR comparison OR compared OR arm OR arms OR crossover OR "cross-over") AND (trial OR study)))                                                                                                                                                                                                                                 | 1,594,275   |
| #3     | TITLE-ABS-KEY(intervention* OR program* OR "case manag*" OR casemanag* OR "occupational therap*" OR counseling OR counselling OR rehabilitation OR "absence management" OR project OR plan OR model)                                                                                                                                                                                                               | 19,494,564  |
| #2     | TITLE-ABS-KEY(beneficiar* OR pension* OR claim* OR compensation* OR insurance* OR security) AND (sickness OR disabilit* OR disabled OR invalidit* OR absente* OR absence OR illness)                                                                                                                                                                                                                               | 135,717     |
| #1     | TITLE-ABS-KEY("return to work" OR "back to work" OR "work* disab*" OR "work* incapacit*" OR "work* incapacilit*" OR "work* capacit*" OR "work* capabilit*" OR "medical leave*" OR "sick leave*" OR "disability leave*" OR absente* OR "work absen*" OR "sickness absen*" OR "sick day*" OR "illness day*" OR "sick listed" OR reintegration OR reemployment OR "re-employment" OR "job reentry" OR "job re-entry") | 85,780      |

#### Search History the Cochrane Library February 7, 2022

| Search | Query                                                                                                                                                                                                                                       | Items found |
|--------|---------------------------------------------------------------------------------------------------------------------------------------------------------------------------------------------------------------------------------------------|-------------|
| #5     | (#1 OR #2) AND #3 AND #4                                                                                                                                                                                                                    | 4886        |
| #4     | (random* AND (controlled OR control OR versus OR vs OR group OR groups OR comparison OR compared OR arm OR arms OR crossover OR "cross-over") AND (trial OR study)):ti,ab,kw (Word variations have been searched)                           | 1,049,038   |
| #3     | (intervention* OR program* OR case NEXT manag* OR casemanag* OR occupational NEXT therap* OR counseling OR counselling OR rehabilitation OR "absence management" OR project OR plan OR model):ti,ab,kw (Word variations have been searched) | 689,466     |

| Search | Query                                                                                                                                                                                                                                                                                                                                                                                                                                                                                   | Items found |
|--------|-----------------------------------------------------------------------------------------------------------------------------------------------------------------------------------------------------------------------------------------------------------------------------------------------------------------------------------------------------------------------------------------------------------------------------------------------------------------------------------------|-------------|
| #2     | ((beneficiar* OR pension* OR claim* OR compensation* OR insurance* OR security) AND (sickness OR disabilit* OR disabled OR invalidit* OR absente* OR absence OR illness)):ti,ab,kw (Word variations have been searched)                                                                                                                                                                                                                                                                 | 3356        |
| #1     | ("return-to-work" OR "back-to-work" OR work* NEXT disab* OR work* NEXT incapacit* OR work* NEXT incapacilit* OR work* NEXT capacit* OR work* NEXT capabilit* OR medical NEXT leave* OR sick NEXT leave* OR disability NEXT leave* OR absente* OR work NEXT absen* OR sickness NEXT absen* OR sick NEXT day* OR illness NEXT day* OR "sick listed" OR reintegration OR reemployment OR "re-employment" OR "job reentry" OR "job re-entry"):ti,ab,kw (Word variations have been searched) | 5873        |
